# Supplementary material
Source: MDPI journal article supplement (https://www.mdpi.com/2304-6732/11/2/136)
Supplement: s1 [file s1]

## Supplementary Material

**Table S1.** Transmittance of 630 nm LED light source in different models.

| Skin and fat |          |       |                     |                     |                     |                     |                     |                     |              |
|--------------|----------|-------|---------------------|---------------------|---------------------|---------------------|---------------------|---------------------|--------------|
| $T_t$        | $T_{qs}$ | $T_m$ | $E_1$               | $E_{1'}$            | $E_{1-1'}$          | $E_2$               | $E_{2'}$            | $E_{2-2'}$          | Light        |
| /cm          | /cm      | /cm   | /mW/cm <sup>2</sup> | transmission |
|              |          |       |                     |                     |                     |                     |                     |                     | rate         |
|              |          |       |                     |                     |                     |                     |                     |                     | /%           |
| 0.530        | 0.200    | 0.330 | 26.5                | 0.4                 | 26.1                | 10.3                | 0.1                 | 10.2                | 39.080       |
| 0.675        | 0.200    | 0.475 | 26.3                | 0.5                 | 25.8                | 7.4                 | 0.1                 | 7.3                 | 28.295       |
| 0.785        | 0.200    | 0.585 | 26.8                | 0.5                 | 26.3                | 6.5                 | 0.1                 | 6.4                 | 24.335       |
| 0.867        | 0.200    | 0.667 | 25.8                | 0.4                 | 25.4                | 6.1                 | 0.1                 | 6.0                 | 23.622       |
| 1.110        | 0.200    | 0.910 | 26.3                | 0.4                 | 25.9                | 3.4                 | 0.1                 | 3.3                 | 12.741       |
| 1.382        | 0.200    | 1.182 | 26.4                | 0.4                 | 26.0                | 2.3                 | 0.1                 | 2.2                 | 8.462        |
| 1.672        | 0.200    | 1.472 | 24.9                | 0.4                 | 24.5                | 0.8                 | 0.0                 | 0.8                 | 3.265        |
| 1.882        | 0.200    | 1.682 | 26.6                | 0.5                 | 26.1                | 0.6                 | 0.0                 | 0.6                 | 2.299        |
| 2.066        | 0.200    | 1.866 | 26.6                | 0.5                 | 26.1                | 0.5                 | 0.1                 | 0.4                 | 1.533        |
| 2.150        | 0.200    | 1.950 | 26.2                | 0.5                 | 25.7                | 0.4                 | 0.0                 | 0.4                 | 1.556        |
| 2.292        | 0.200    | 2.092 | 27.3                | 0.4                 | 26.9                | 0.3                 | 0.0                 | 0.3                 | 1.115        |
| 2.561        | 0.200    | 2.361 | 27.1                | 0.5                 | 26.6                | 0.2                 | 0.0                 | 0.2                 | 0.752        |
| 3.423        | 0.200    | 3.223 | 27.1                | 0.5                 | 26.6                | 0.1                 | 0.0                 | 0.1                 | 0.376        |
| Flesh        |          |       |                     |                     |                     |                     |                     |                     |              |
| $T_t$        | $T_{qs}$ | $T_m$ | $E_1$               | $E_{1'}$            | $E_{1-1'}$          | $E_2$               | $E_{2'}$            | $E_{2-2'}$          | Light        |
| /cm          | /cm      | /cm   | /mW/cm <sup>2</sup> | transmission |
|              |          |       |                     |                     |                     |                     |                     |                     | rate         |
|              |          |       |                     |                     |                     |                     |                     |                     | /%           |
| 0.500        | 0.200    | 0.300 | 26.7                | 0.4                 | 26.3                | 11.0                | 0.1                 | 10.9                | 41.445       |
| 0.888        | 0.200    | 0.688 | 26.8                | 0.4                 | 26.4                | 5.9                 | 0.1                 | 5.8                 | 21.970       |
| 1.475        | 0.200    | 1.275 | 26.8                | 0.4                 | 26.4                | 1.7                 | 0.0                 | 1.7                 | 6.439        |
| 1.730        | 0.200    | 1.530 | 26.0                | 0.4                 | 25.6                | 1.0                 | 0.1                 | 0.9                 | 3.516        |
| 1.880        | 0.200    | 1.680 | 26.7                | 0.4                 | 26.3                | 0.8                 | 0.0                 | 0.8                 | 3.042        |
| 2.200        | 0.200    | 2.000 | 26.1                | 0.4                 | 25.7                | 0.7                 | 0.0                 | 0.7                 | 2.724        |
| 2.400        | 0.200    | 2.200 | 26.1                | 0.4                 | 25.7                | 0.5                 | 0.0                 | 0.5                 | 1.946        |
| 3.212        | 0.200    | 3.012 | 26.3                | 0.4                 | 25.9                | 0.1                 | 0.0                 | 0.1                 | 0.386        |

$T_t$ , total thickness;  $T_{qs}$ , quartz sheet thickness;  $T_m$ , tissue thickness;  $E_1$ , irradiance by the light source;  $E_{1'}$ , environmental irradiance;  $E_2$ , irradiance of light passing through meat; and  $E_{2'}$ , environmental irradiance. The results are depicted to three decimal places.
